# Supplementary material
Source: PubMed Central journal article supplement (PMC2937421)
Supplement: supp_192_18_4535__1.pdf [file supp_192_18_4535__1.pdf]

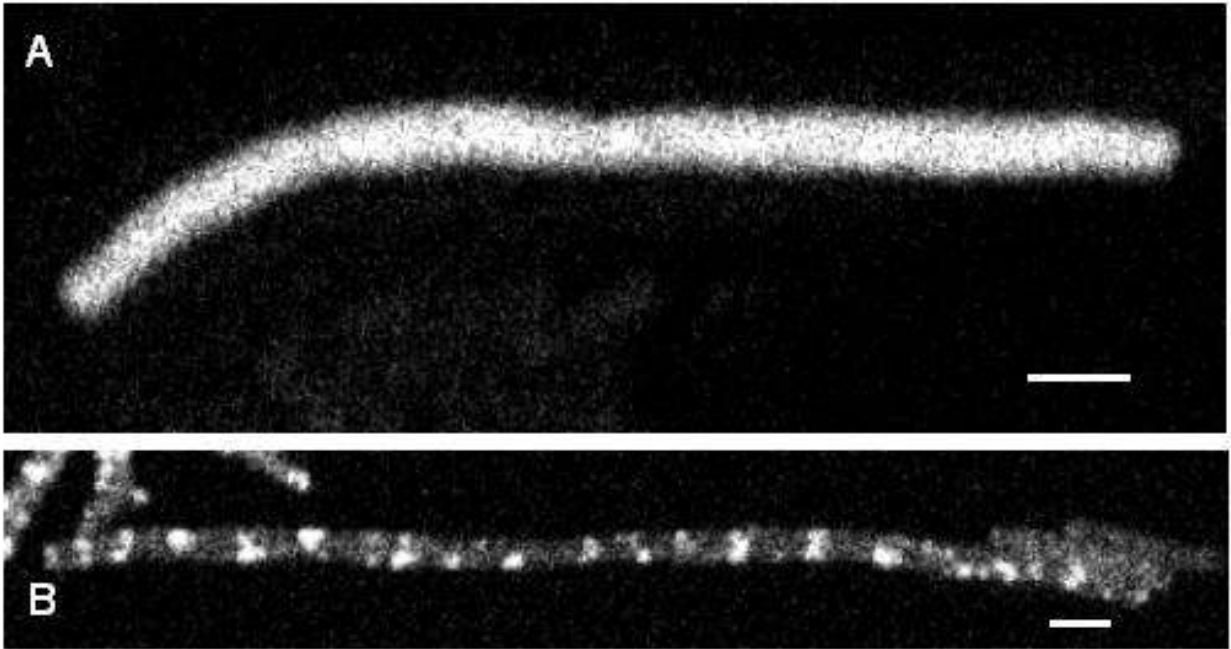

### Supplementary Figure 1

Confocal fluorescence micrographs showing *E. coli* DH5 $\alpha$  cells expressing torA-GFP2 from the pBad24 expression vector induced with 500  $\mu$ M (A) and 1mM (B) arabinose. Scale-bars 2  $\mu$ m.
