# Supplementary material
Source: PubMed Central journal article supplement (PMC2937421)
Supplement: supp_192_18_4535__2.pdf [file supp_192_18_4535__2.pdf]

## Supplementary Methods

### Sequences of oligonucleotide primers used in the study

Sequences are shown 5'-3'

#### For GFP multimers (restriction sides in bold and linker underlined)

|                             |                                        |                                                       |
|-----------------------------|----------------------------------------|-------------------------------------------------------|
| torA-GFP <sub>(STOP)</sub>  | PCR_TMAO_EcoRI_F                       | CGGCCGAATTCACCACTGAACAATA                             |
|                             | PCR_GFP2_KpnI_R                        | CCGGGTACCTTTGTATAGTTCATC                              |
| torA-GFP2                   | PCR_GFP2_KpnI_F                        | AATTGGTACCAATAATAATAATAATCGTAAAGGAGAAGAAGACTTTTCACTGG |
|                             | PCR_GFP2_XbaI_R                        | TTCCCTCTAGATCATTGTATAGTTCATCC                         |
| torA-GFP2 <sub>(STOP)</sub> | PCR_GFP2_del_R                         | CCGGTCTAGATTTGTATAGTTCATCC (and PCR_GFP2_KpnI_F)      |
| torA-GFP3                   | PCR_GFP3_XbaI_F                        | TTATCTAGAAATAATAATAATAATCGTAAAGGAGAAGAAGACTTTTCACTGG  |
|                             | PCR_GFP3_PstI_R                        | TTTTACTGCAGTCATTGTATAGTTCATCC                         |
| torA-GFP3 <sub>(STOP)</sub> | PCR_GFP3_del_R                         | CGTTCTGCAGTTTGTATAGTTCATCC (and PCR_GFP3_XbaI_F)      |
| torA-GFP4                   | PCR_GFP4_PstI_F                        | TTACTGCAGAATAATAATAATAATCGTAAAGGAGAAGAAGACTTTTCACTGG  |
|                             | PCR_GFP4_SphI_R                        | CTTTTGCATGCTCATTGTATATGTTTCATC                        |
| torA-GFP4 <sub>(STOP)</sub> | PCR_GFP4_del_R                         | CGTTGCATGCTTTGTATATGTTTCATCC (and PCR_GFP4_PstI_F)    |
| torA-GFP5                   | PCR_GFP5_SphI_F                        | TTAGCATGCAATAATAATAATAATCGTAAAGGAGAAGAAGACTTTTCACTGG  |
|                             | PCR_GFP5_HindIII_R                     | CCCAAGCTTTCATTGTATAGTTCATCC                           |
| torA-GFP5 <sub>(STOP)</sub> | PCR_GFP5_del_R                         | GCCAAAGCTTTTTGTATAGTTCATCCAT (and PCR_GFP5_SphI_F)    |
| torA-GFP6                   | PCR_GFP6_F                             | TTAAAGCTTAATAATAATAATAATCGTAAAGGAGAAGAAGACTTTTC       |
|                             |                                        | (and PCR_GFP5_HindIII_R)                              |
| GFP                         | PCR_EcoRI_GFP_F                        | AATTGAATTCACCATGCGTAAAGGAGAAG (and PCR_GFP2_KpnI_R)   |
| GFP2                        | PCR_GFP2_KpnI_F and PCR_GFP5_HindIII_R |                                                       |

#### For AmiA-GFP and NlpA-GFP (restriction sides in bold and overlap underlined)

|                        |                   |                                                    |
|------------------------|-------------------|----------------------------------------------------|
| AmiA                   | PCR_AmiA_EcoRI_F  | GAAAGAATTC AAGAATGAGCACTTTTAAAC                    |
|                        | PCR_AmiA-GFP_R    | <u>TCCTTTACGCGCCGCTCGCTTTTTCGAATGTGCTTTCTGTTT</u>  |
| AmiA <sub>(noSP)</sub> | PCR_AmiA_EcoRI_F2 | CTTTTGAATTCACCATATGAAAGACGAAC (and PCR_AmiA-GFP_R) |
| GFP <sub>AmiA</sub>    | PCR_AmiA-GFP_F    | <u>AAGCACATTCGAAAAAGCGAGCGGGCGCGTAAAGGAGAAGA</u>   |
|                        | PCR_GFP_HindIII_R | GGGCCGGAAGCTTATTTGTATAGTT                          |

NlpA

PCR\_NlpA\_EcoRI\_F

GCCGAATTCAAGAATGAAACTGACAAC

PCR\_NlpA-GFP\_R

CGATTATTATTATTATTCCAGCCAGGCACCGCG

NlpA<sub>(noLB)</sub>

PCR\_NlpA\_EcoRI\_F2

CCGGAATTCAAGAATGGATGAAAAGCATA (and PCR\_NlpA-GFP\_R)

GFP<sub>NlpA</sub>

PCR\_NlpA-GFP\_F

GCTGGAATAATAATAATAATCGTAAAGGAGAAGAACTTTTCACTGG

PCR\_GFP\_HindIII\_R

GGCCCGGAAGCTTATTTGTATAGTT
